# Supplementary material for: SLITRK5 is a negative regulator of hedgehog signaling in osteoblasts
Source: PubMed Central journal article supplement (PMC8322311; doi:10.1038/s41467-021-24819-w), 2021-07-29
Supplement: 41467_2021_24819_MOESM1_ESM.pdf [file 41467_2021_24819_MOESM1_ESM.pdf]

## Supplementary Information

### **SLITRK5 is a negative regulator of hedgehog signaling in osteoblasts**

Jun Sun<sup>1†</sup>, Dong Yeon Shin<sup>1, 2†</sup>, Mark Eiseman<sup>1</sup>, Alisha R Yallowitz<sup>1</sup>, Na Li<sup>3</sup>, Sarfaraz Lalani<sup>1</sup>, Zan Li<sup>1</sup>, Michelle Cung<sup>1</sup>, Seoyeon Bok<sup>1</sup>, Shawon Debnath<sup>1</sup>, Sofia Jenia Marquez<sup>1</sup>, Tommy E. White<sup>4</sup>, Abdul G Khan<sup>4</sup>, Ivo C Lorenz<sup>4</sup>, Jae-Hyuck Shim<sup>5</sup>, Francis S. Lee<sup>6</sup>, Ren Xu<sup>3\*</sup>, Matthew B. Greenblatt<sup>1, 7\*</sup>

<sup>1</sup> Department of Pathology and Laboratory Medicine Weill Cornell Medicine, New York, NY, USA

<sup>2</sup> Current Address: Research Center, LegoChem BioSciences, INC., Daejeon 34302, South Korea

<sup>3</sup> State Key Laboratory of Cellular Stress Biology, School of Medicine, Xiamen University, Xiamen, Fujian 361102, China

<sup>4</sup> Tri-Institutional Therapeutics Discovery Institute, New York 10021, United States

<sup>5</sup> Division of Rheumatology, Department of Medicine, University of Massachusetts Medical School, 364 Plantation Street, Worcester, MA 01605, USA

<sup>6</sup> Department of Psychiatry, Weill Cornell Medical College, New York, NY 10065, USA

<sup>7</sup> Research Division, Hospital for Special Surgery, New York, NY 10021, USA

† These authors contributed equally to this work.

\*Correspondence:

Ren Xu

86-592- 2880577

xuren526@xmu.edu.cn

Matthew B. Greenblatt

1-212-746-1602

mag3003@med.cornell.edu

## Supplementary Figure 1

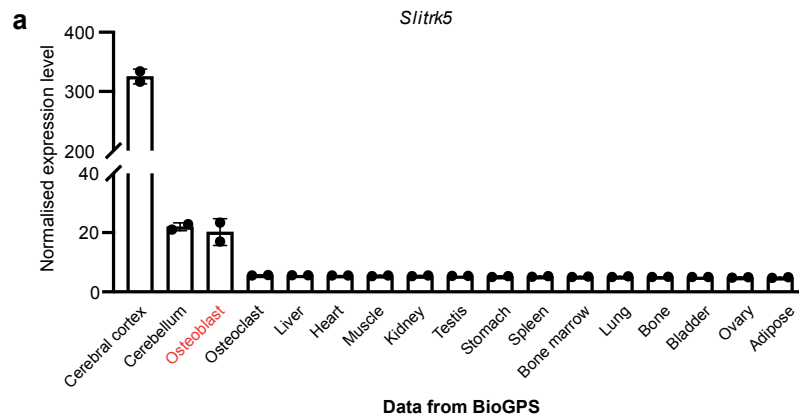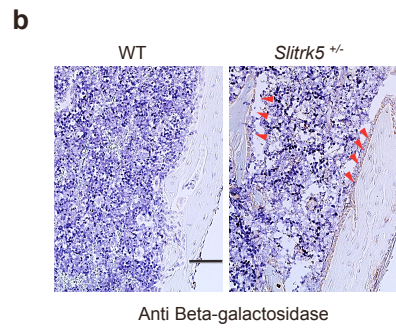

**Supplementary Figure 1. a** *Slitrk5* mRNA level in different cells and tissues. The raw expression data were obtained from BioGPS (<http://biogps.org/>). Data are presented as mean±s.d., n=2 biologically independent samples. **b** Immunostaining of mouse femur sections with beta-galactosidase antibody, indicating the expression of *Slitrk5* in osteoblasts. Data are representative of two independent experiments, scale bar=100  $\mu$ m.

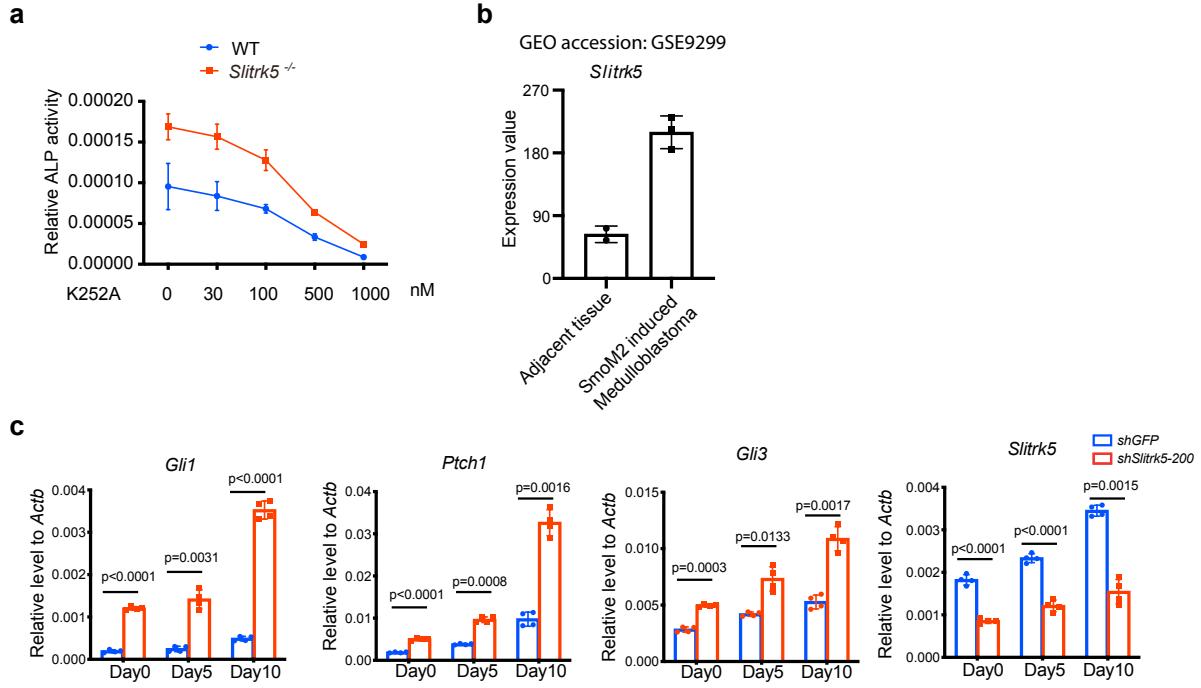

**Supplementary Figure 2.** **a** Primary osteoblasts from WT and *Slitrk5*<sup>-/-</sup> mice were treated with the indicated doses of K252a and cultured in osteoblast differentiation medium. ALP activity was measured at day 8 of osteoblast differentiation. Data are presented as mean±s.d. n=10 biologically independent samples. **b** *Slitrk5* mRNA level in SmoM2 induced medulloblastoma and adjacent tissue (GEO: GSE9299). Data are presented as mean±s.d., n=3 biologically independent samples. **c** Human osteoblast-like cells (Saos-2) infected with *Slitrk5* or GFP shRNA and cultured in osteoblast differentiation medium. mRNA level of *Slitrk5*, *Gli1*, *Ptch1* and *Gli3* at 0, 5 and 10 days of differentiation was assessed by RT-PCR. Data are presented as mean±s.d., n=4 biologically independent samples, 2-tailed unpaired t-test.

Supplementary Figure 3

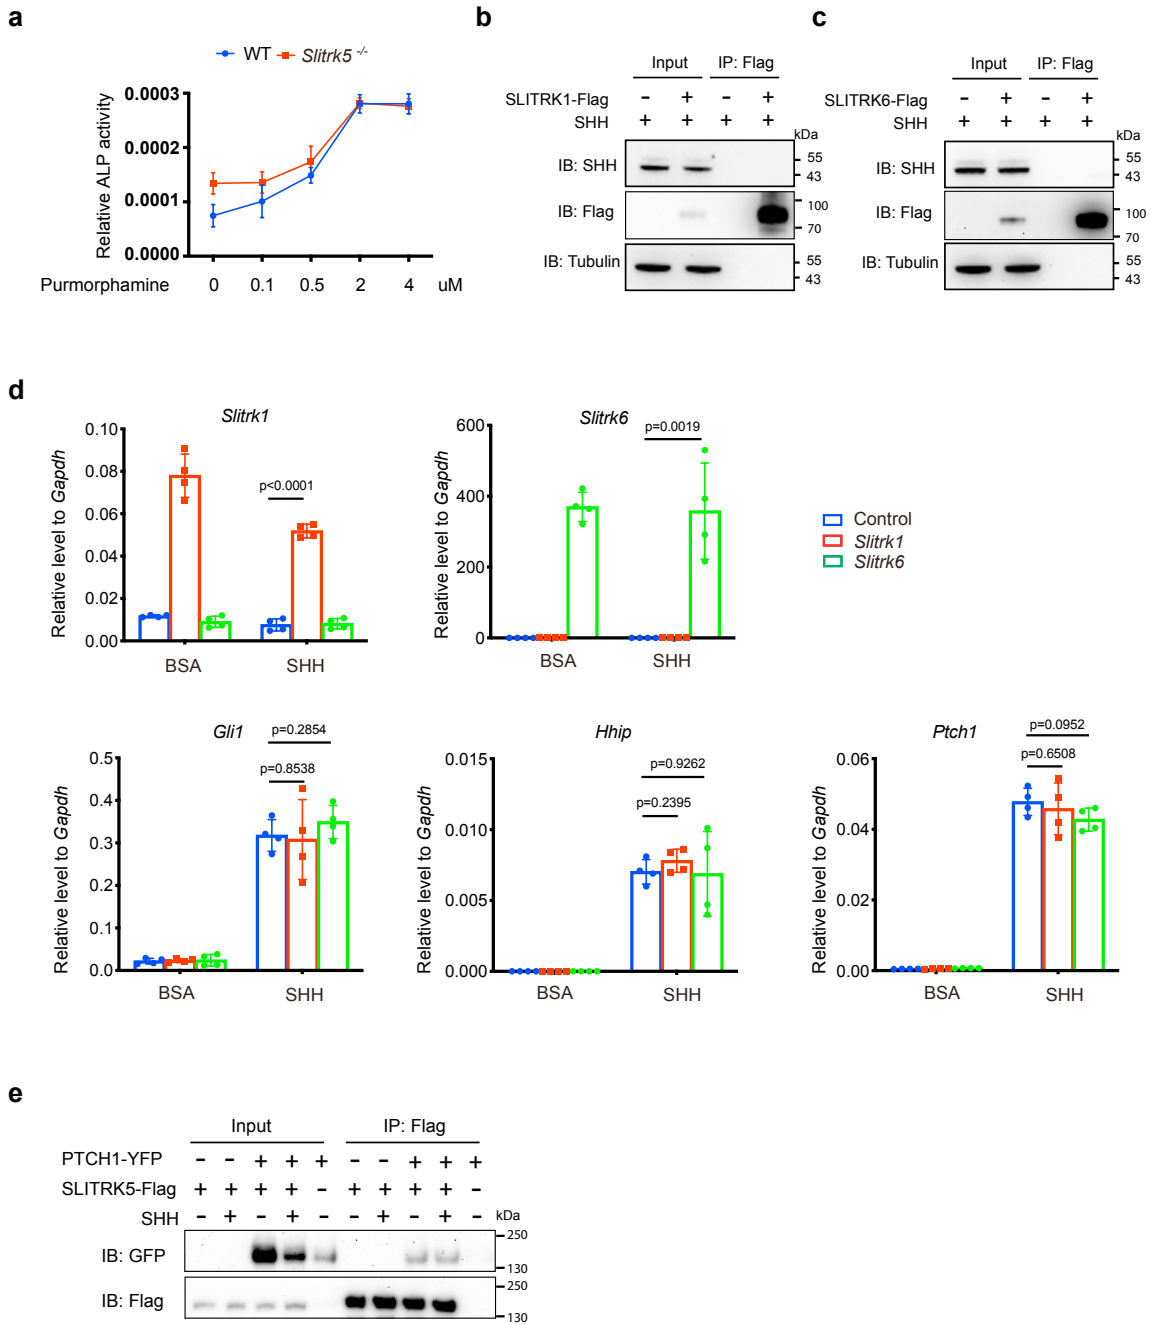

**Supplementary Figure 3.** **a** Primary osteoblasts from WT and *Slitrk5*<sup>-/-</sup> mice were treated with the indicated doses of Purmorphamine and cultured in osteoblast differentiation medium. ALP activity was measured at day 8 of differentiation. Data are presented as mean±s.d. n=10 biologically independent samples. **b** Co-immunoprecipitation of Flag-SLITRK1 and SHH in HEK293T cells. Data are representative of two independent experiments. **c** Co-immunoprecipitation of Flag-SLITRK6 and SHH in HEK293T cells. Data are representative of two independent experiments. **d** C3H10T1/2 cells transfected with either control, *Slitrk1* or *Slitrk6* overexpression vectors were treated with BSA or 100ng/ml SHH in serum free medium for 48h. *Gli1*, *Ptch1*, *Hhip*, *Slitrk1* and *Slitrk6* mRNA levels were measured by RT-PCR. n=4 biologically independent samples, 2-tailed unpaired t-test. **e** Co-immunoprecipitation of Flag-SLITRK5 and PTCH1-YFP in C3H10T1/2 cells. Data are representative of two independent experiments.

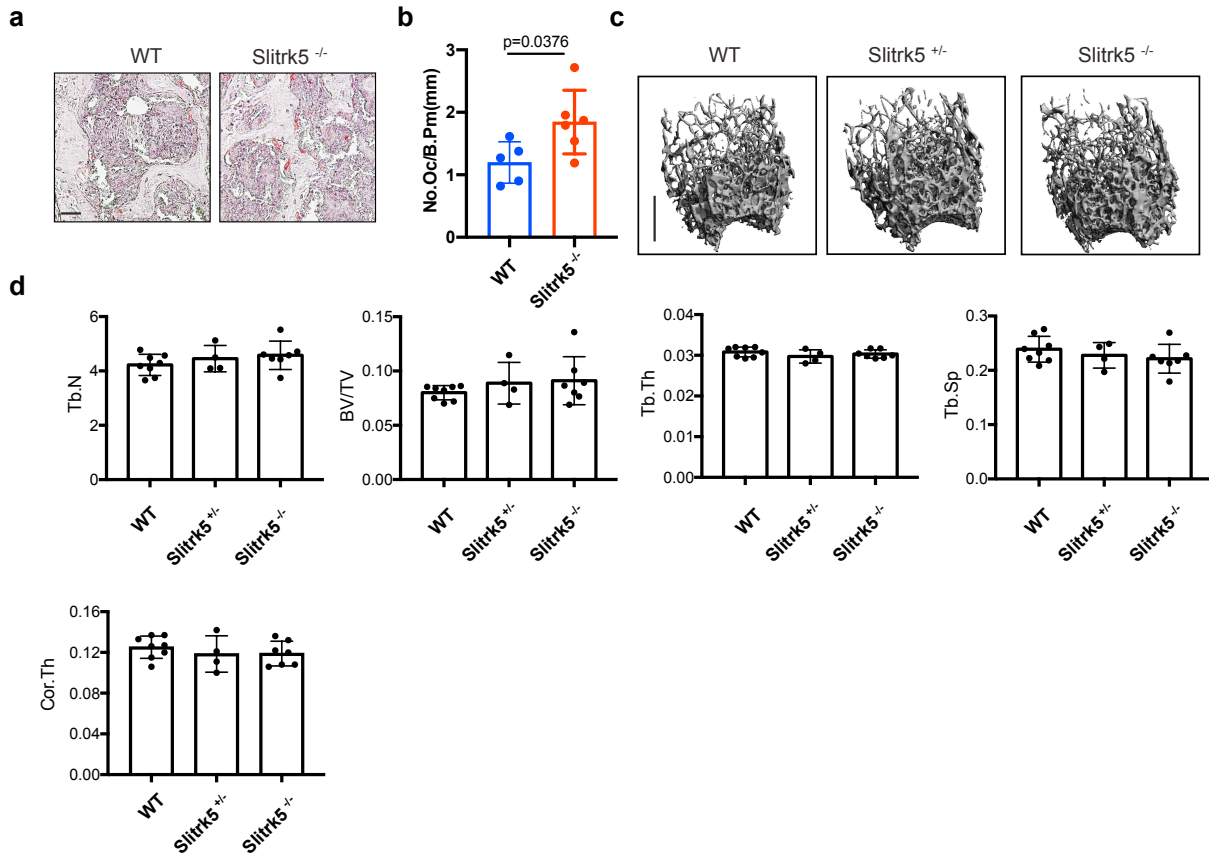

**Supplementary Figure 4. a&b** Representative images of TRAP staining (a) and quantification of No.Oc./B.Pm (b) of the L3 vertebrae in 7-week-old WT and Slitrk5<sup>-/-</sup> female mice. osteoclast number/bone perimeter (No.Oc./B.Pm) . N=5 or 6 per group. Data are presented as mean±s.d, 2-tailed unpaired t-test, scale bar=100um. **c&d** Representative images of uCT (c) and quantification of bone volume/total volume (BV/TV), trabecular number per cubic millimeter (Tb.N), trabecular thickness (Tb.Th) , trabecular separation (Tb.Sp) and cortical bone thickness (Cor.Th)(d) of femurs in WT, Slitrk5<sup>+/-</sup> and Slitrk5<sup>-/-</sup> female mice at 7-week-old. N=4-7 per group. Data are presented as mean±s.d, 2-tailed unpaired t-test, scale bar=1mm.

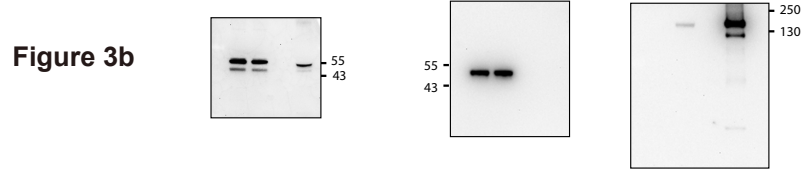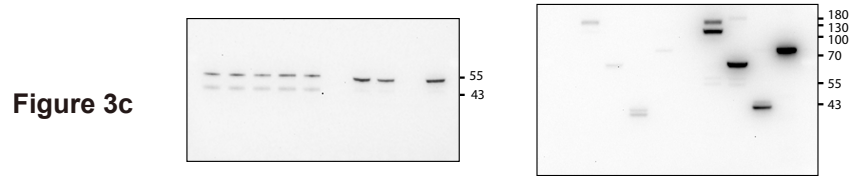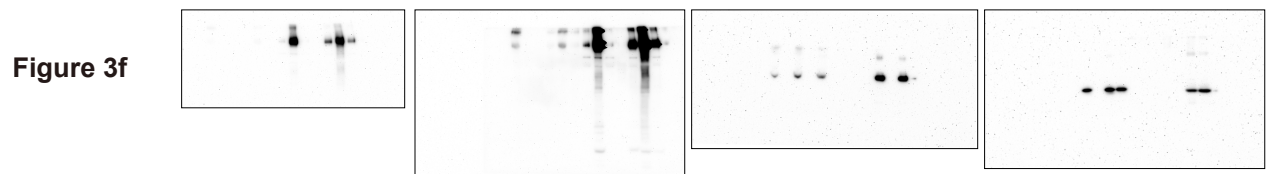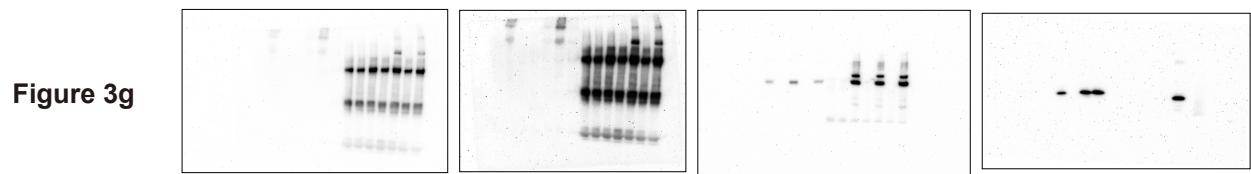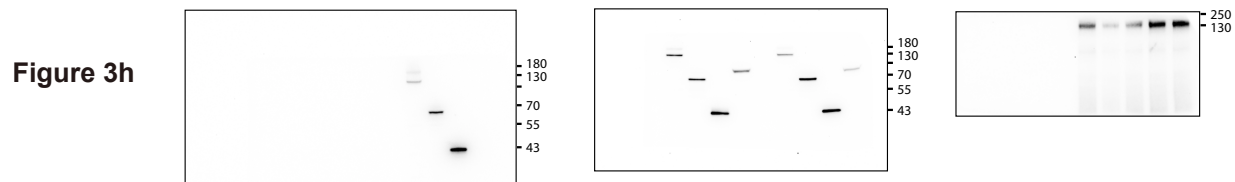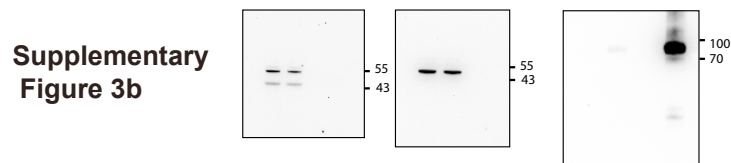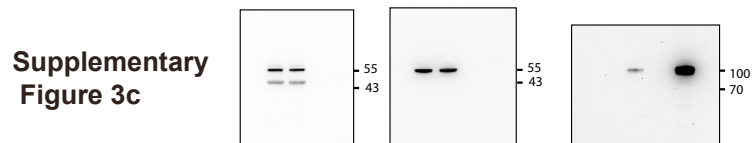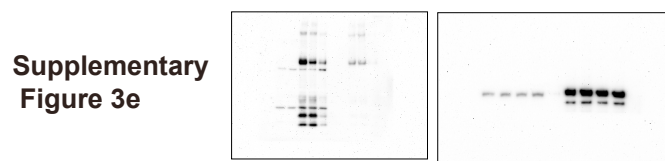

## Supplementary Table

| Name            | Species | shRNA primers                                              |
|-----------------|---------|------------------------------------------------------------|
| shSlitrk5-199   | Mouse   | CCGGCCTCCTGCACCTGGGTAATAACTCGAGTTATTACCCAGGTGCAGGAGGTTTTTG |
| shSlitrk5-200   | Mouse   | CCGGTGCAGAAACCATCGATTACTCGAGTAATAATCGATGGTTTCTGCATTTTTG    |
| sh-control      | Mouse   | CCGGGCGCGATAGCGCTAATAATTTCTCGAGAAATTATTAGCGCTATCGCGCTTTTT  |
|                 |         |                                                            |
|                 |         | <b>qPCR primers</b>                                        |
| Slitrk5-forward | Mouse   | CGCAGAACAGACTTCCTGGAAG                                     |
| Slitrk5-reverse | Mouse   | TCAGCCTCTCAATCCTGTTGCC                                     |
| Slitrk6-forward | Mouse   | AACAACCCACCATAACAACGGA                                     |
| Slitrk6-reverse | Mouse   | TTCCTCAACTTCTTCCAAATGCT                                    |
| Bsg-forward     | Mouse   | AGAGGACACAGGCACTTACGAG                                     |
| Bsg-reverse     | Mouse   | GACTTCCTGGACAGAGGTTTGG                                     |
| Hhip-forward    | Mouse   | GAGAGATCCTGTGTGGTGGCTT                                     |
| Hhip-reverse    | Mouse   | GCTGCATTCTGAGTTGTTGGTG                                     |
| Hprt-forward    | Mouse   | TCAGTCAACGGGGACATAAA                                       |
| Hprt-reverse    | Mouse   | GGGGCTGTAAGCTTAACCAG                                       |
| Gli1-forward    | Mouse   | CCAAGCCAACCTTTATGTCAGGG                                    |
| Gli1-reverse    | Mouse   | AGCCCGCTTCTTTGTTAATTTGA                                    |
| Ptch1-forward   | Mouse   | AAAGAACTGCGGCAAGTTTTTG                                     |
| Ptch1-reverse   | Mouse   | CTTCTCCTATCTTCTGACGGGT                                     |
| Ptch2-forward   | Mouse   | GGAAGTACATCCGTCAACAAC                                      |
| Ptch2-reverse   | Mouse   | GAAGACGAGCATTACCGCTGCA                                     |
| Ocn-forward     | Mouse   | TGCTTGTGACGAGGTATCAG                                       |
| Ocn-reverse     | Mouse   | GTGACATCCATACTTGCAGG                                       |
| Alp-forward     | Mouse   | CGGGACTGGTACTCGGATAA                                       |
| Alp-reverse     | Mouse   | ATTCCACGTCGGTTCTGTTC                                       |
| Sp7-forward     | Mouse   | TCACTTGCCTGCTCTGTTCC                                       |
| Sp7-reverse     | Mouse   | GCGGCTGATTGGCTTCTTCT                                       |
| Runx2-forward   | Mouse   | CCAACCGAGTCATTTAAGGCT                                      |
| Runx2-reverse   | Mouse   | GCTCACGTCGCTCATCTTG                                        |
| Gli2-forward    | Mouse   | AACTGTGGAGGACTGCCTACA                                      |
| Gli2-reverse    | Mouse   | GGCATCTCCATGCCACTGTCAT                                     |
| Col1a1-forward  | Mouse   | CCTCAGGGTATTGCTGGACAAC                                     |
| Col1a1-reverse  | Mouse   | CAGAAGGACCTTGTGGCCAGG                                      |
| Gli3-forward    | Human   | TCAGCAAGTGGCTCCTATGGTC                                     |
| Gli3-reverse    | Human   | GCTCTGTTGTCCGGCTTAGGATC                                    |
| Gli1-forward    | Human   | AGCCTTCAGCAATGCCAGTGAC                                     |
| Gli1-reverse    | Human   | GTCAGGACCATGCACTGTCTTG                                     |
| Ptch1-forward   | Human   | GCTGCACTACTTCAGAGACTGG                                     |
| Ptch1-reverse   | Human   | CACCAGGAGTTTGTAGGCAAGG                                     |
| Slitrk5-forward | Human   | CCTCCAGTACAATCTCATCCGC                                     |
| Slitrk5-reverse | Human   | TCAAGCCAGAGAAGACGCCTGA                                     |
